# Supplementary material
Source: Springer Nature journal article supplement (https://www.springermedizin.de/resource/supplementary/12955_2010_676_MOESM2_ESM.pdf/9561062)

CHQ mean (range 0-100)

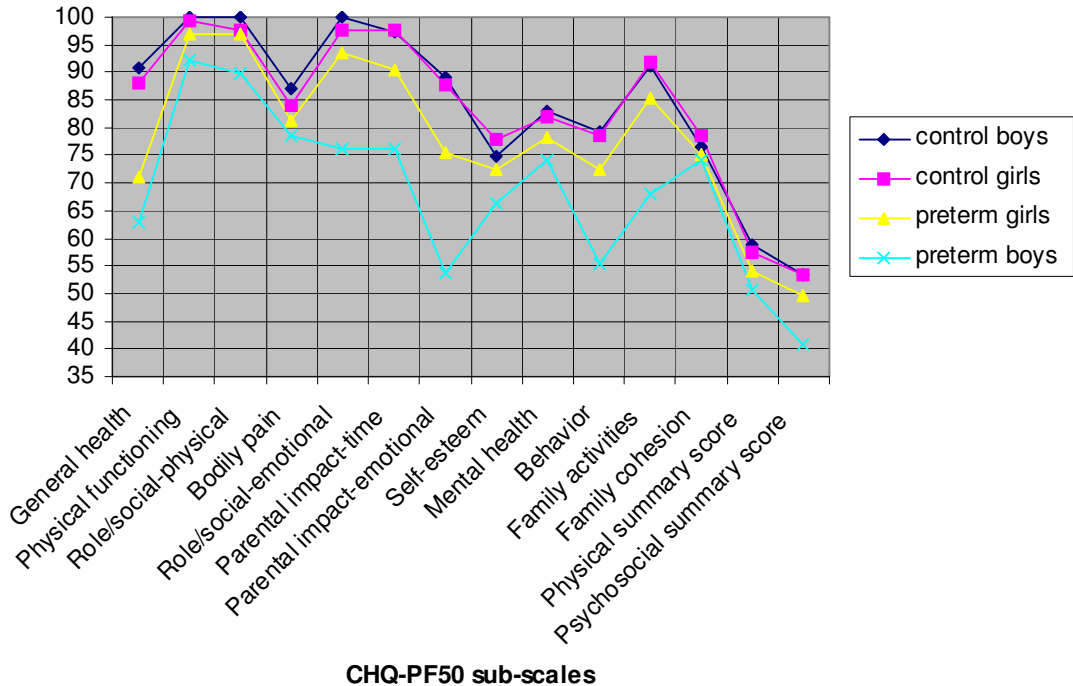

Supplement: MOESM2 [file 9561062]
